# Supplementary material for: Dietary bitter ginger-derived zerumbone improved memory performance during aging through inhibition of the PERK/CHOP-dependent endoplasmic reticulum stress pathway
Source: Royal Society of Chemistry journal article supplement (doi:10.1039/d4fo00402g), 2024-01-01

**Fig.3. Zerumbone alleviated D-gal-induced neuronal apoptosis and oxidative damage in vitro.**

Representative Western blotting images of Bcl-2 and Bax protein in D-gal-induced SH-SY5Y cells.

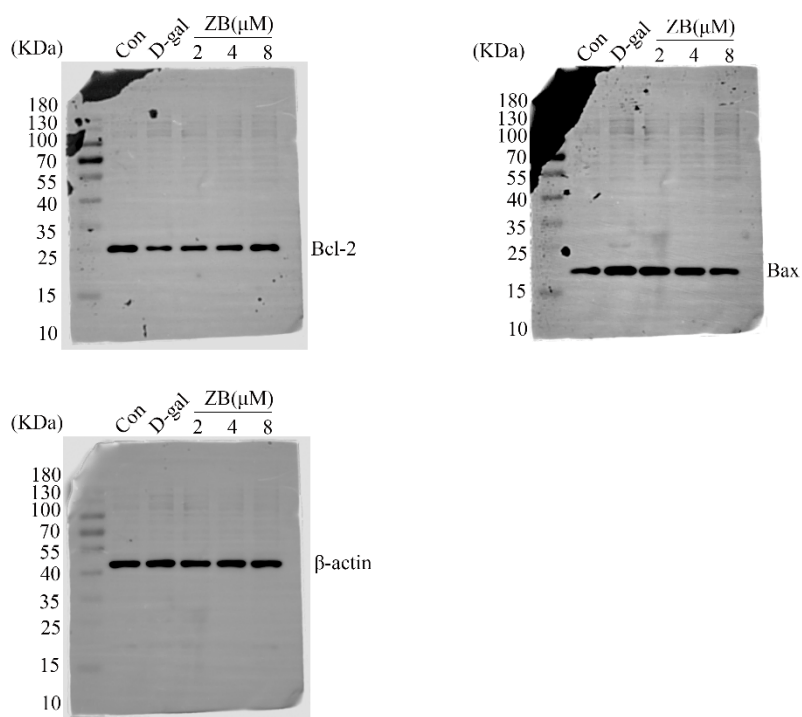

**Fig.4. Zerumbone inhibited D-gal-induced activation of PERK/CHOP pathway in vivo and in vitro**

Representative Western blotting images of GRP78, p-PERK/PERK, and CHOP in D-gal-induced mice.

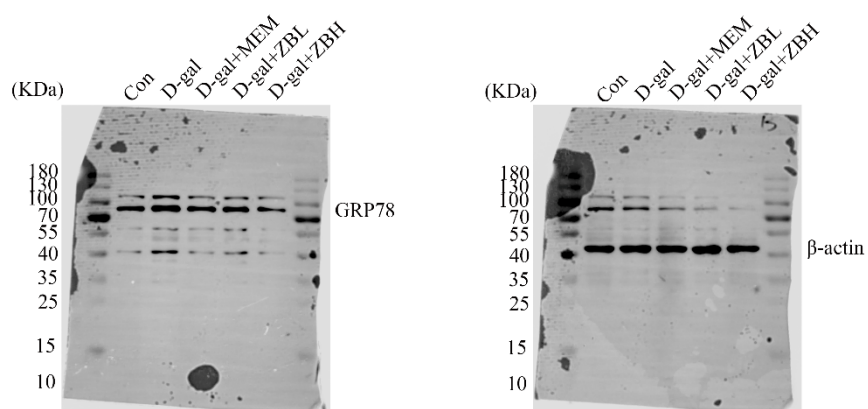

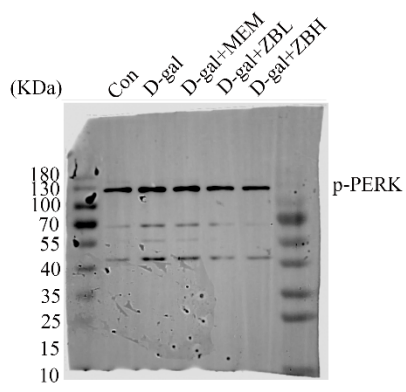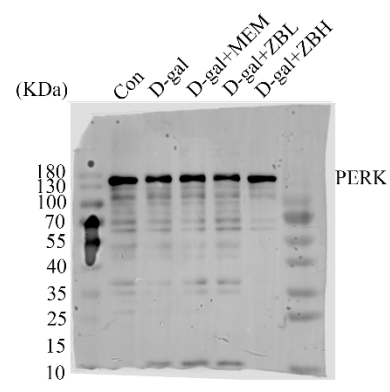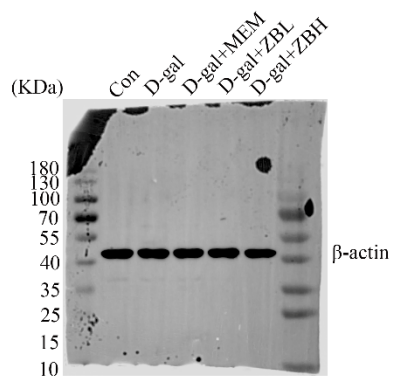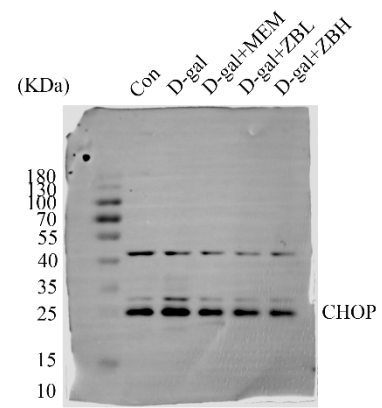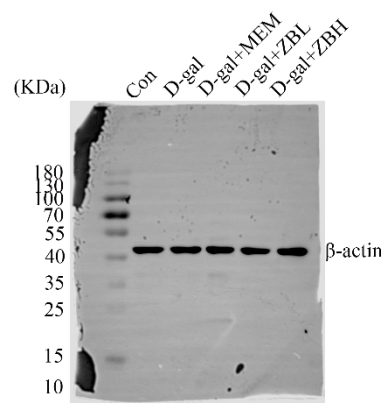

Representative Western blotting images of GRP78, p-PERK/PERK, and CHOP in D-gal-induced SH-SY5Y cells

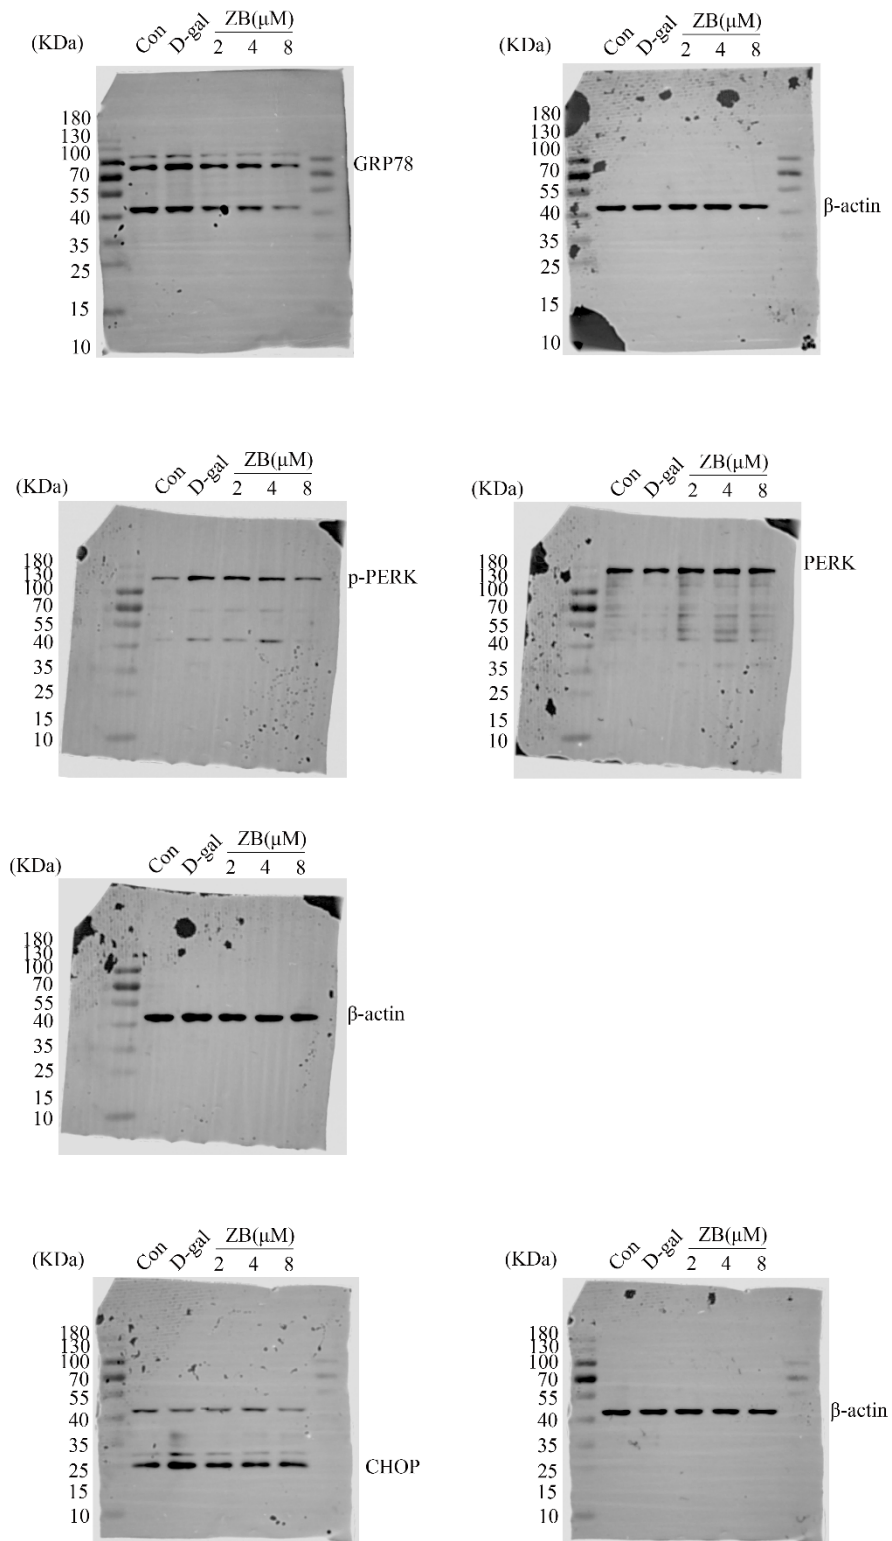

**Fig.5. Zerumbone inhibited D-gal-induced ER stress and apoptosis by PERK-dependent pathway in vitro.**

When CCT020312 (5  $\mu$ M) and ZB (8  $\mu$ M) were applied to treat cells together, representative Western blotting images of GRP78, p-PERK/PERK, CHOP, Caspase-12 and Bcl-2/Bax in D-gal-induced SH-SY5Y cells.

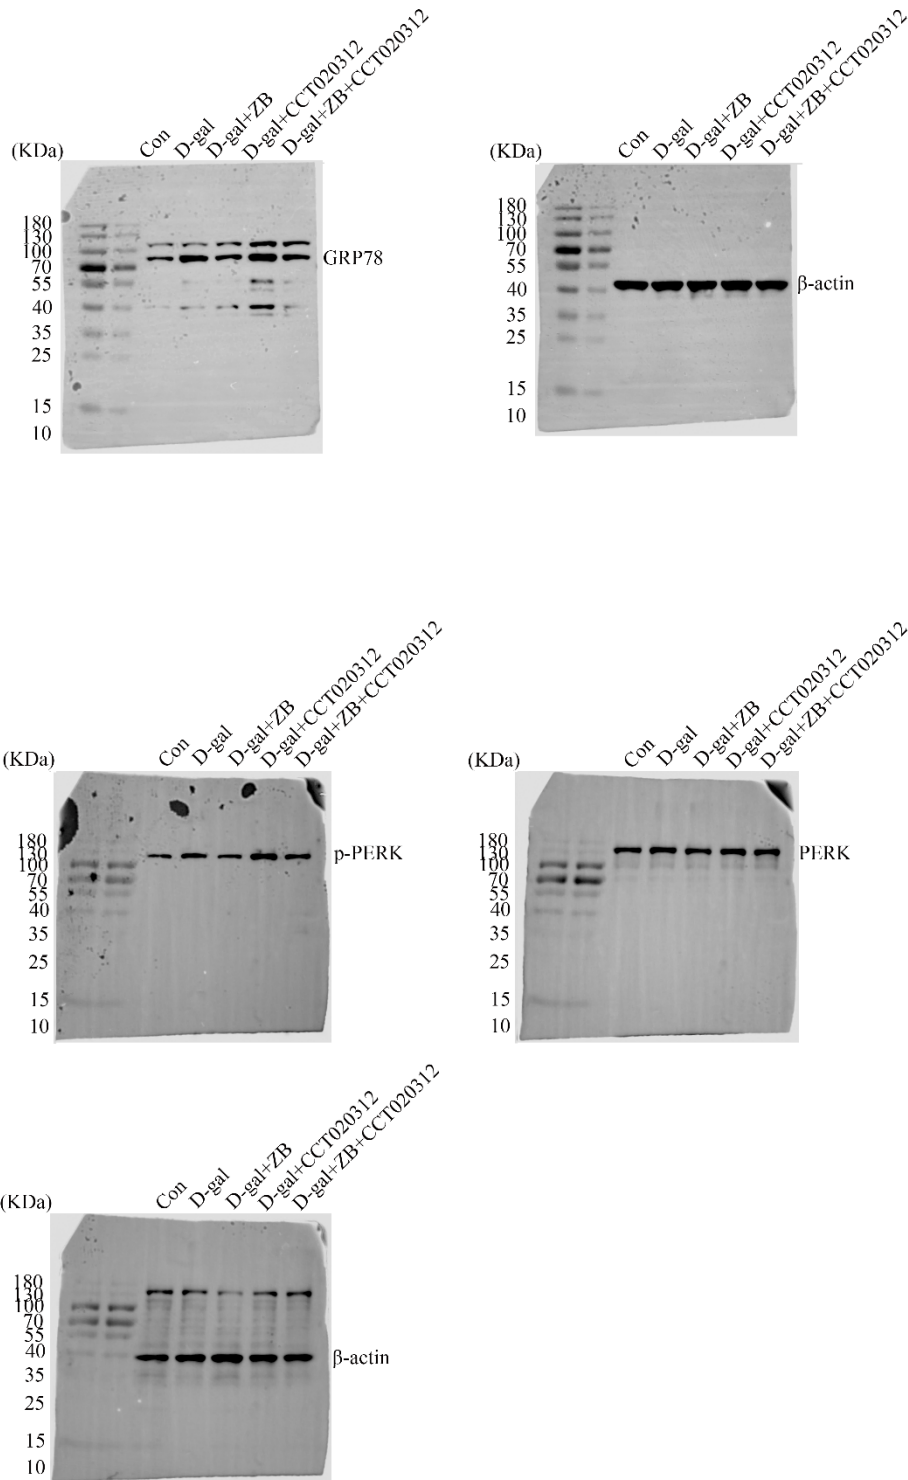

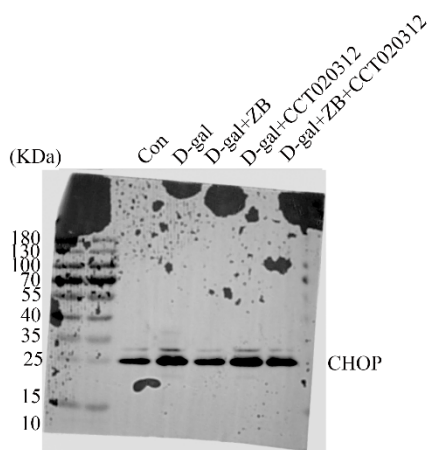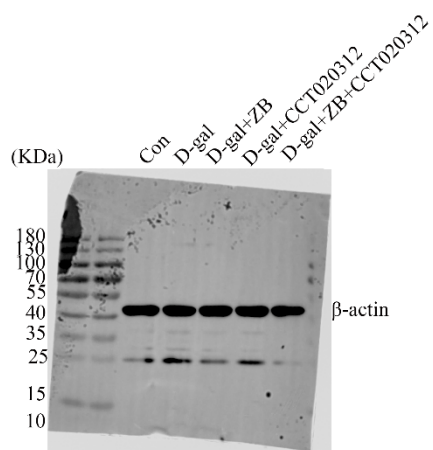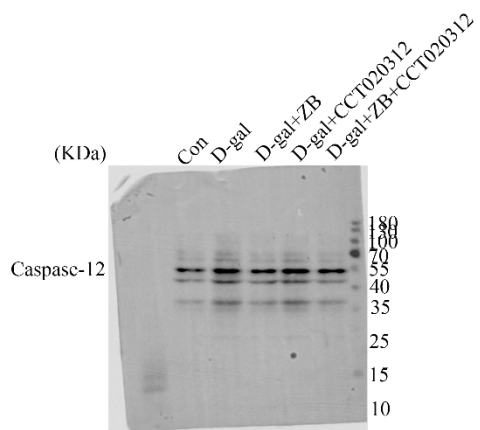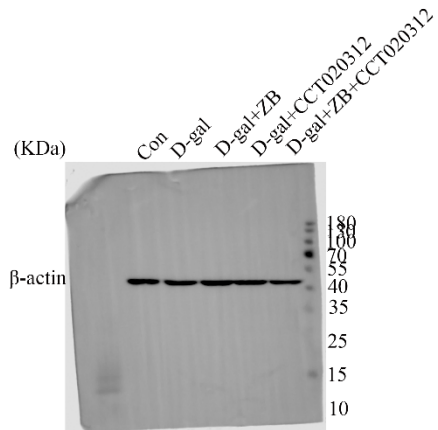

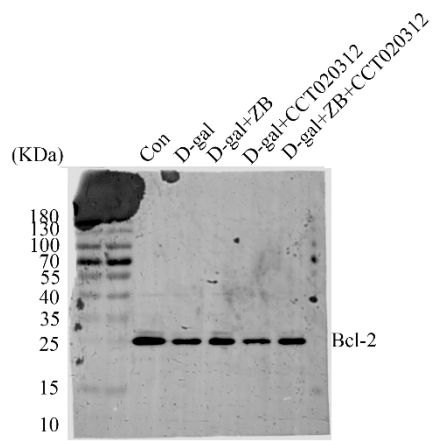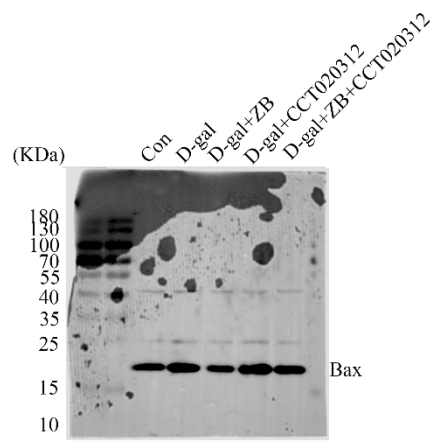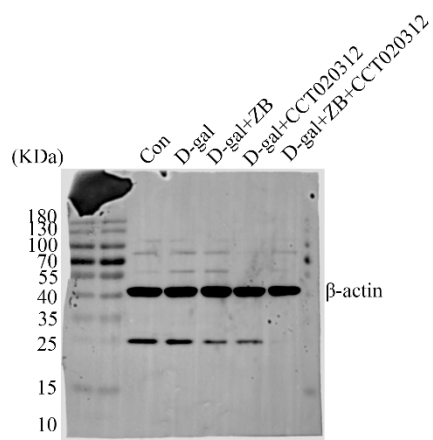

When GSK2606414 (0.25  $\mu$ M) and ZB (8  $\mu$ M) were applied to treat cells together, representative Western blotting images of GRP78, p-PERK/PERK, CHOP, Caspase-12 and Bcl-2/Bax in D-gal-induced SH-SY5Y cells.

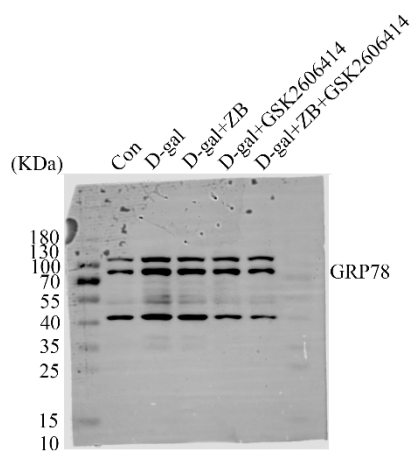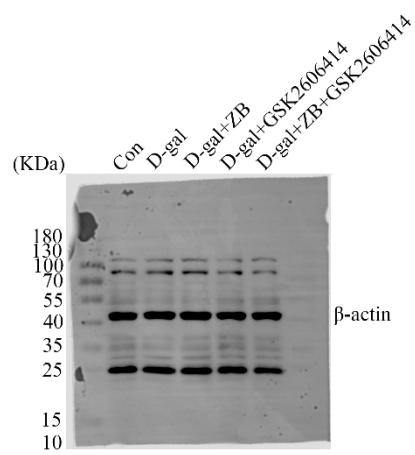

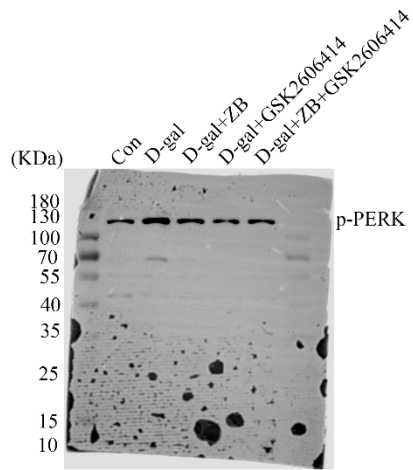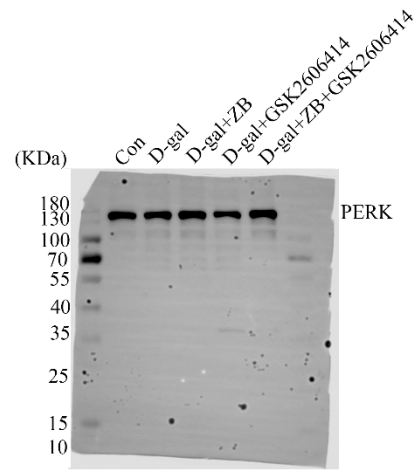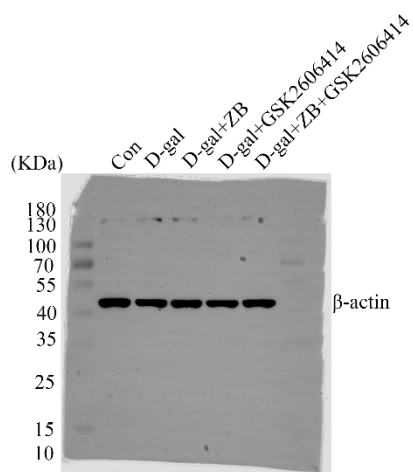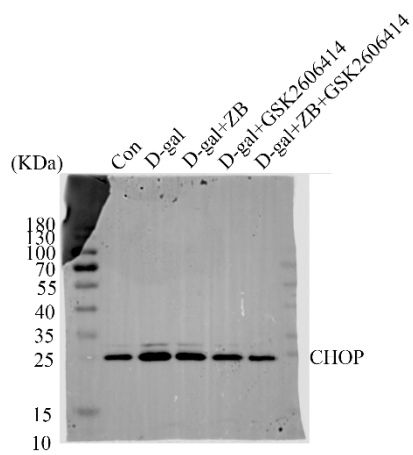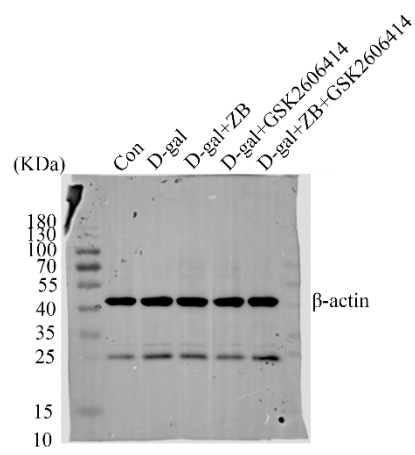

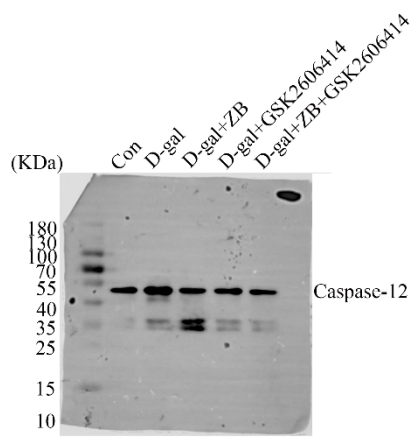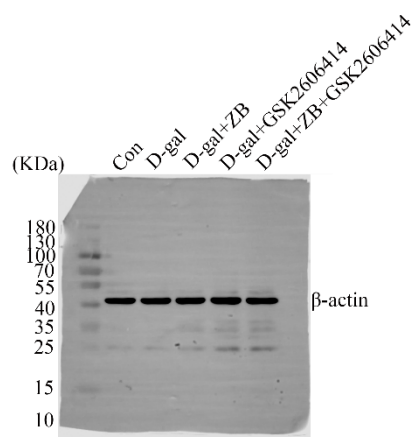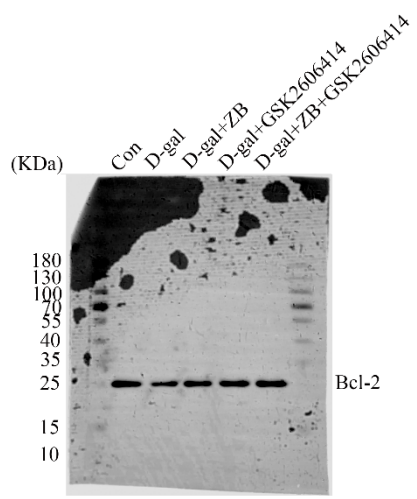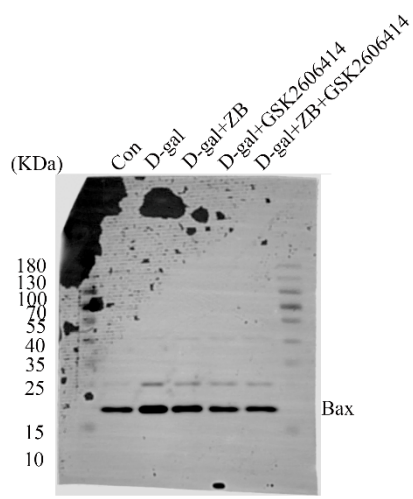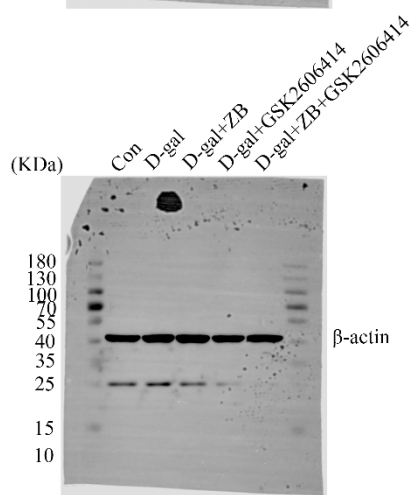



**Fig.6 Calculation of medium efficiency equations and molecular docking**

Representative Western blotting images of p-PERK/PERK in D-gal-induced SH-SY5Y cells.

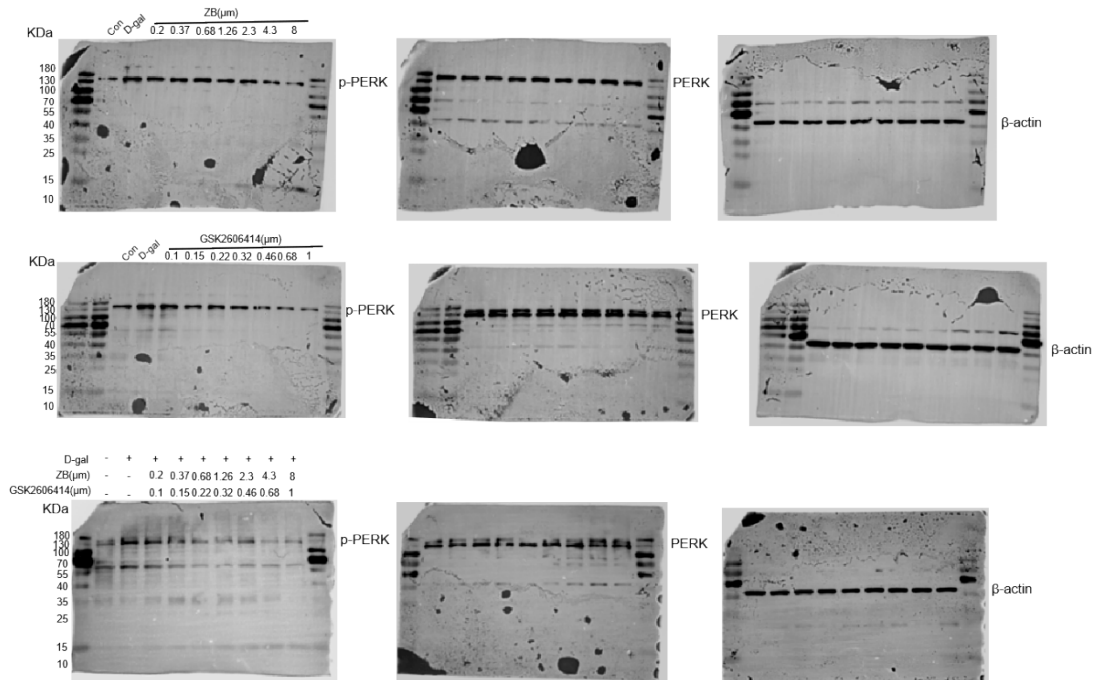

**Fig.7. Zerumbone reversed tunicamycin-induced the activation of PERK/CHOP pathway and apoptosis in vitro.**

Representative Western blotting images of GRP78, p-PERK/PERK, CHOP, Caspase-12 and Bcl-2/Bax in tunicamycin-induced SH-SY5Y cells.

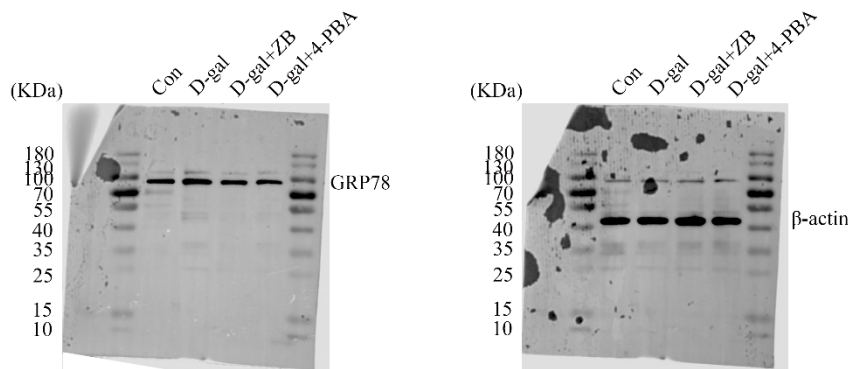

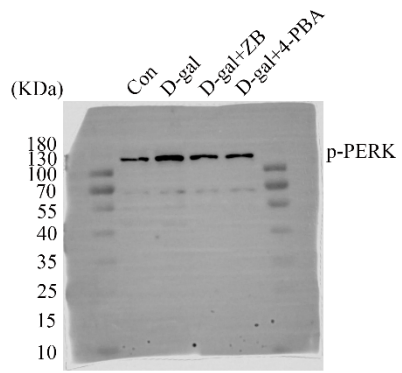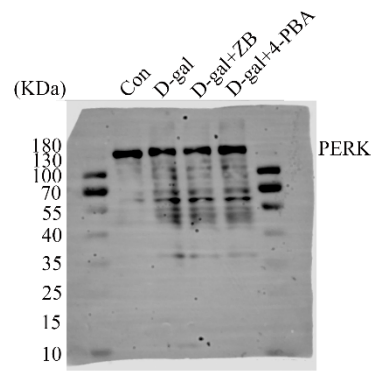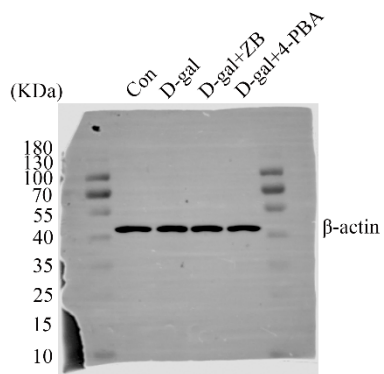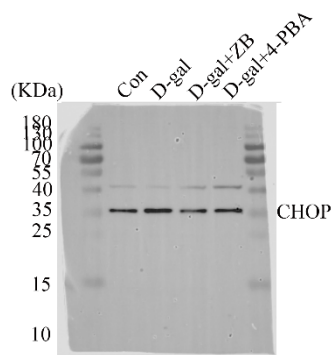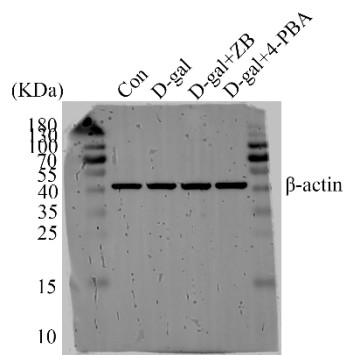

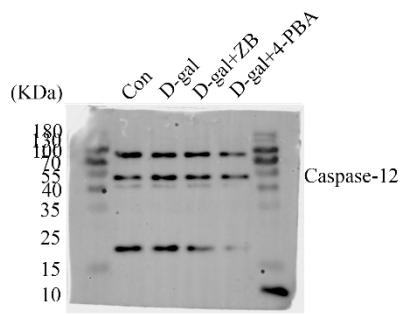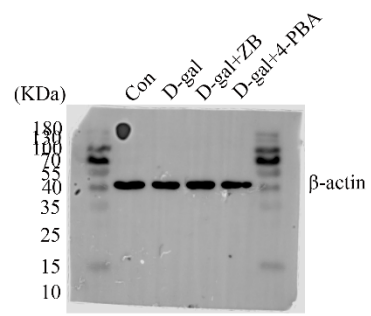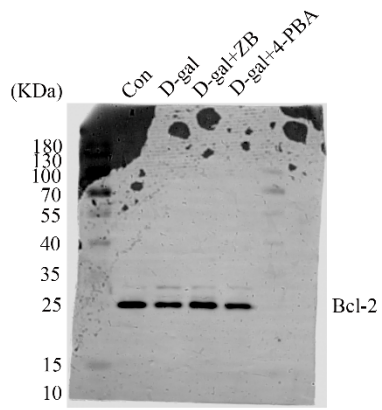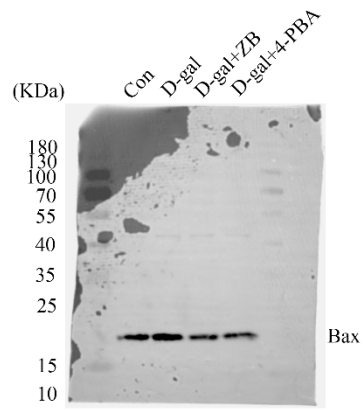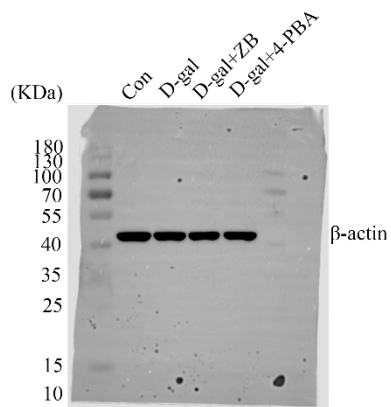

Supplement: d4fo00402g1.pdf [file d4fo00402g1.pdf]
