# Supplementary material for: Dietary bitter ginger-derived zerumbone improved memory performance during aging through inhibition of the PERK/CHOP-dependent endoplasmic reticulum stress pathway
Source: Royal Society of Chemistry journal article supplement (doi:10.1039/d4fo00402g), 2024-01-01

**Fig.3. Zerumbone alleviated D-gal-induced neuronal apoptosis and oxidative damage in vitro.**

Repetitive Western blotting images of Bcl-2 and Bax protein in D-gal-induced SH-SY5Y cells.

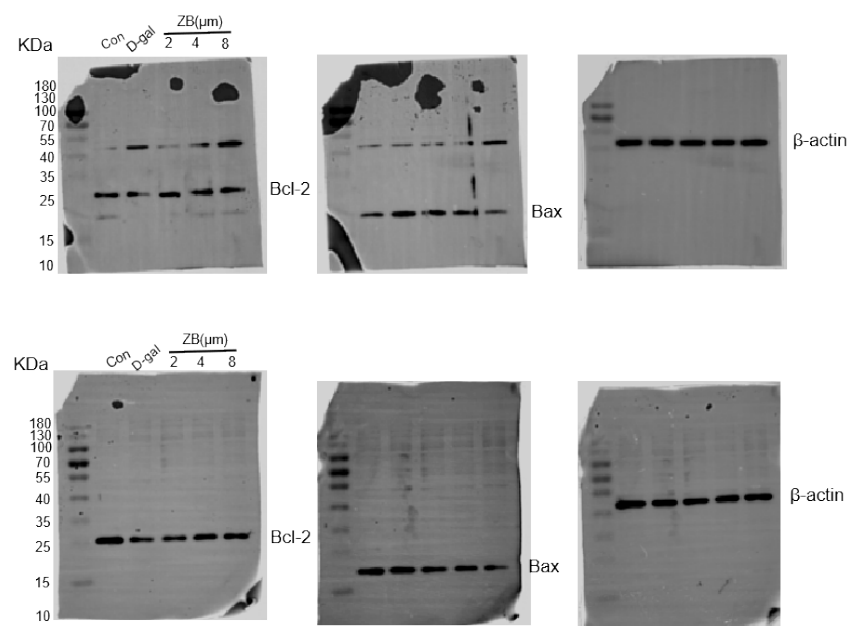

**Fig.4. Zerumbone inhibited D-gal-induced activation of PERK/CHOP pathway in vivo and in vitro**

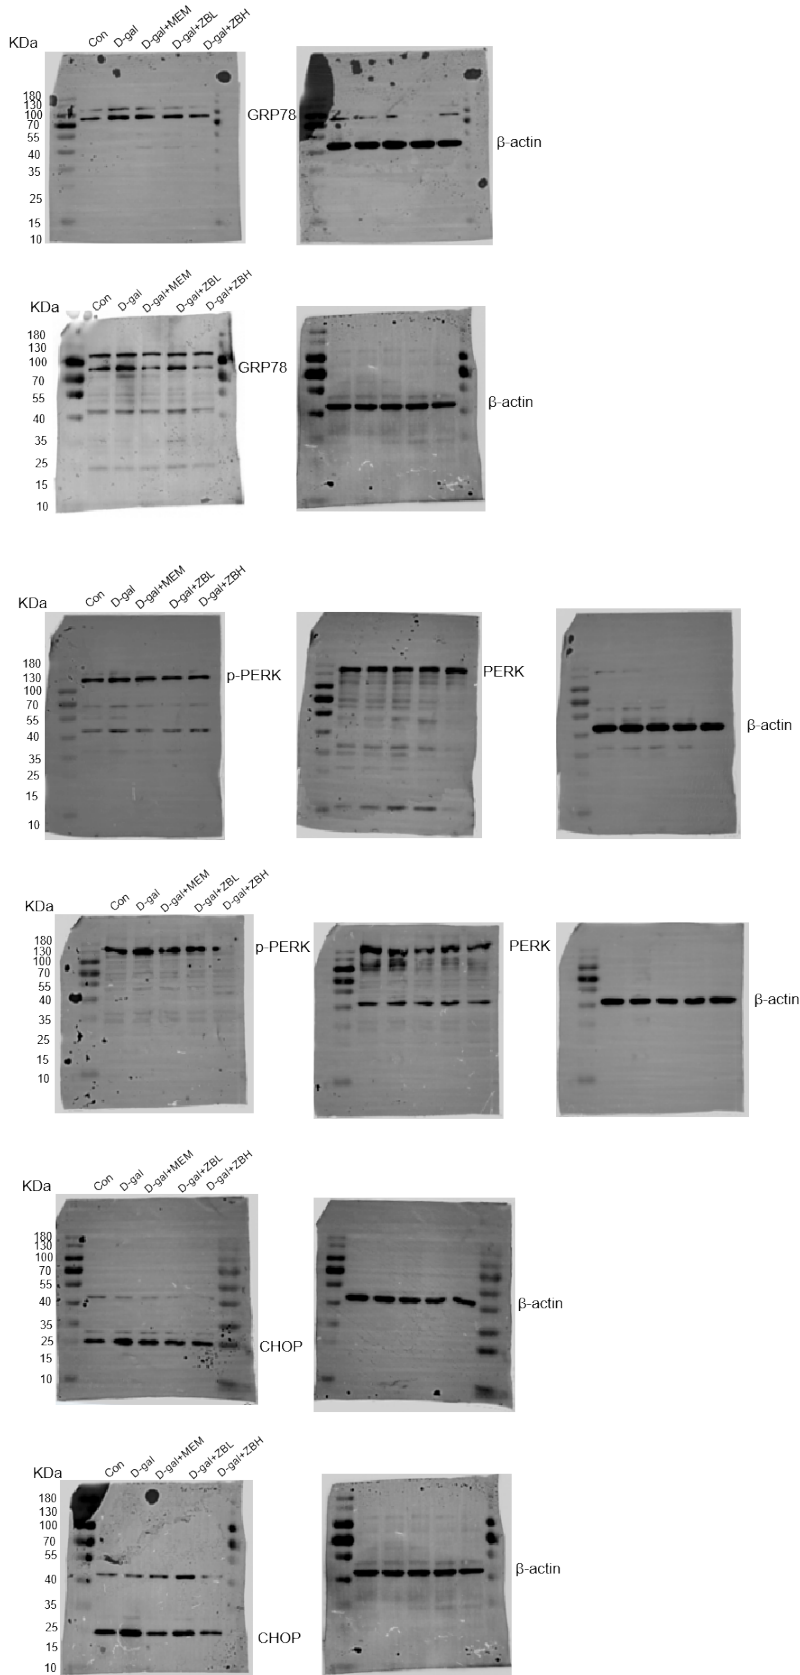

Repetitive Western blotting images of GRP78, p-PERK/PERK, and CHOP in D-gal-induced mice.

Repetitive Western blotting images of GRP78, p-PERK/PERK, and CHOP in D-gal-induced SH-SY5Y cells

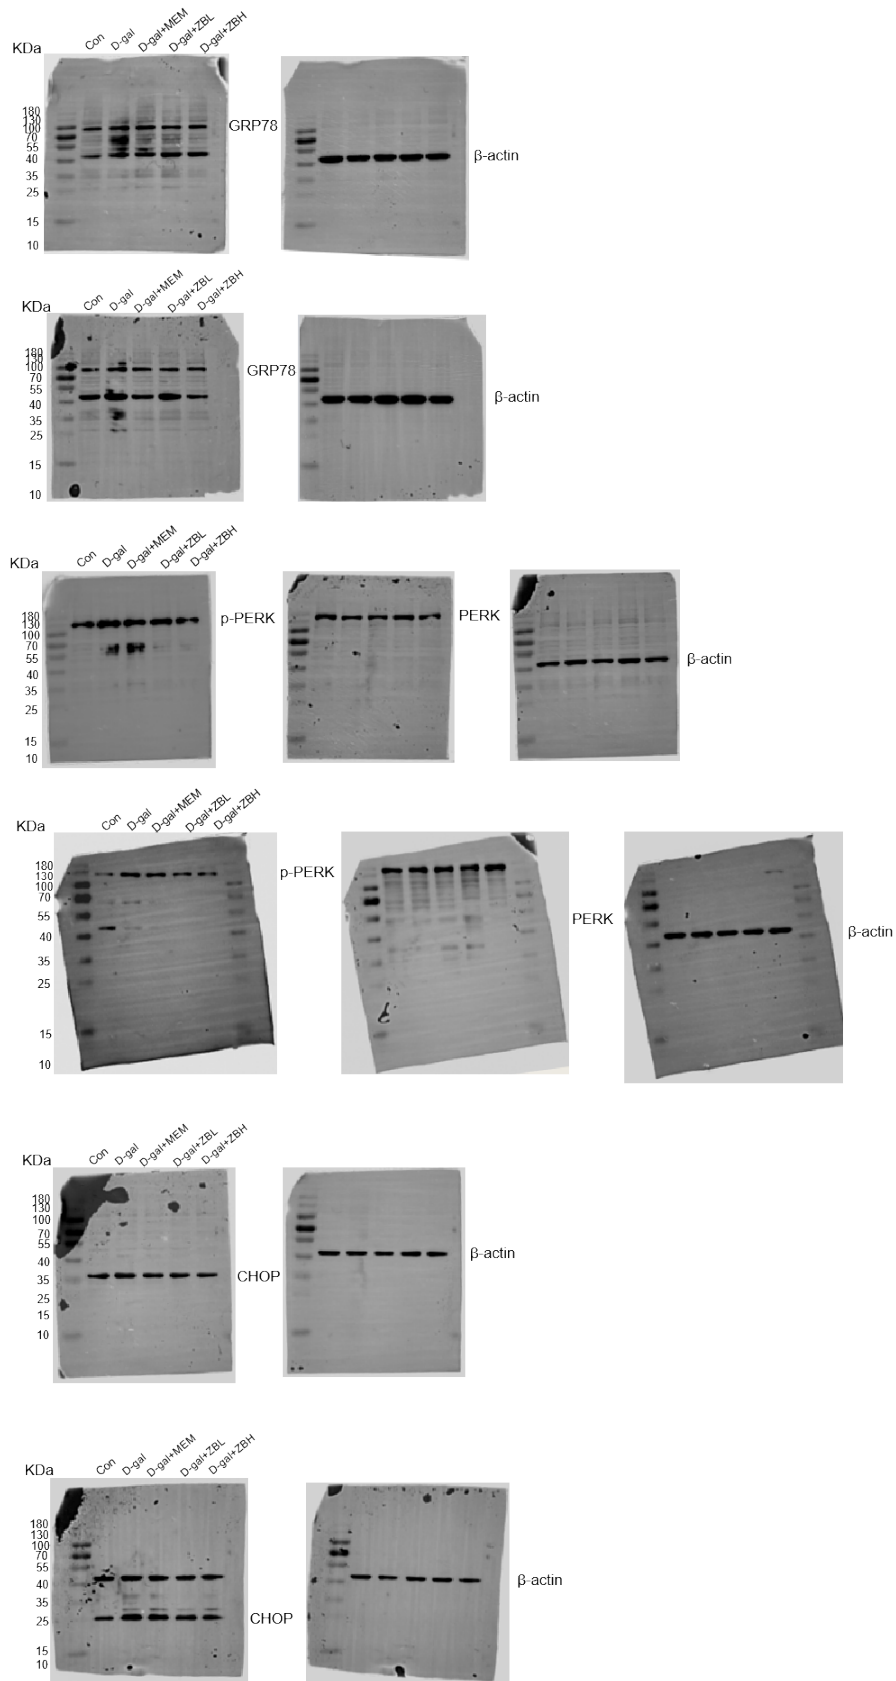

**Fig.5. Zerumbone inhibited D-gal-induced ER stress and apoptosis by PERK-dependent pathway in vitro.**

When CCT020312 (5  $\mu$ M) and ZB (8  $\mu$ M) were applied to treat cells together, repetitive Western blotting images

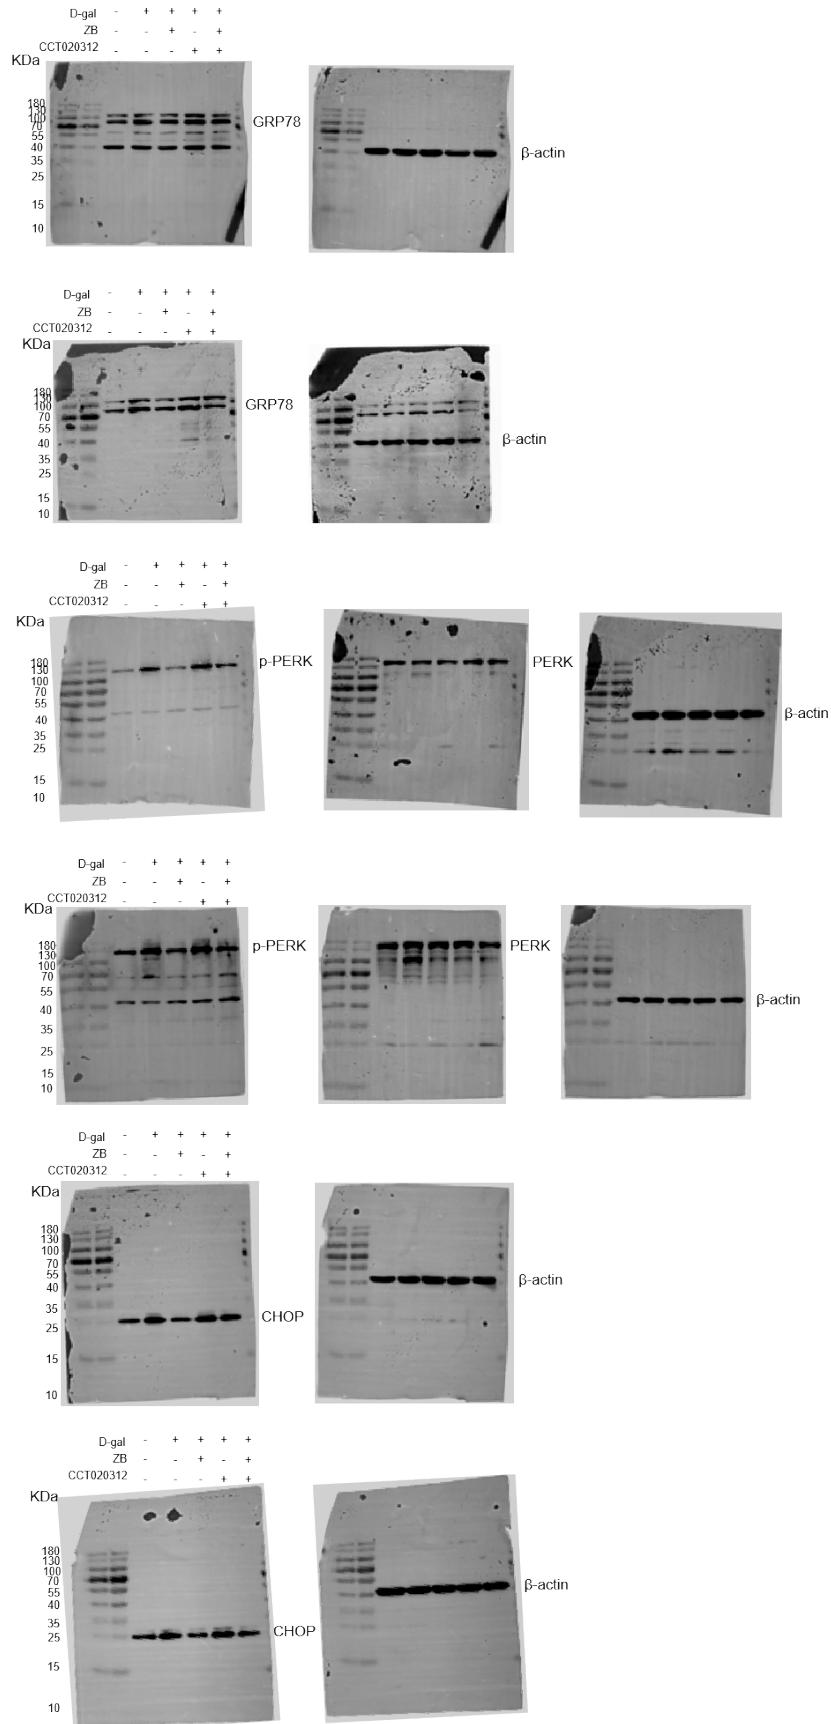

of GRP78, p-PERK/PERK, CHOP, Caspase-12 and Bcl-2/Bax in D-gal-induced SH-SY5Y cells.

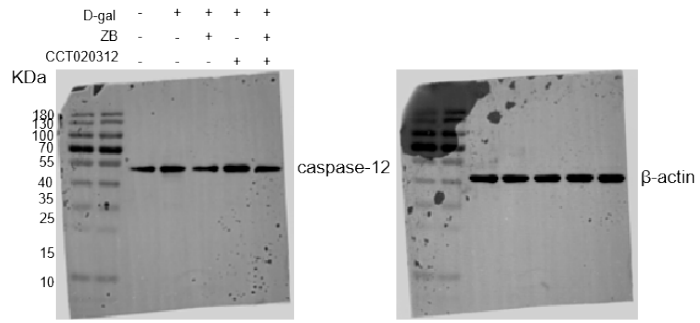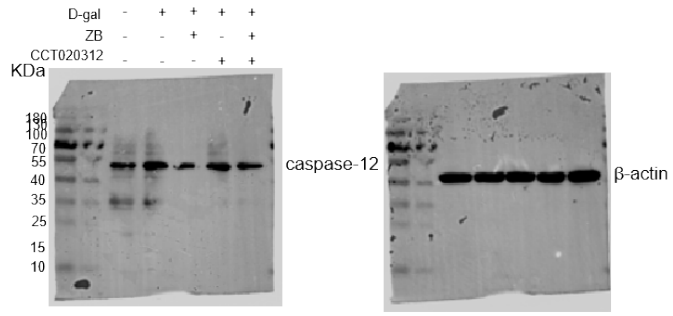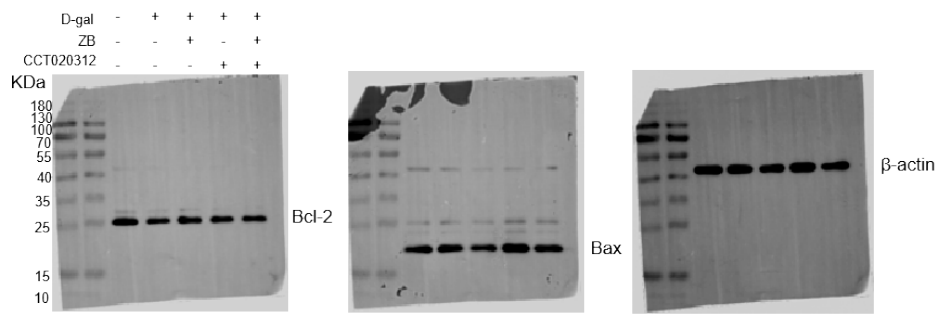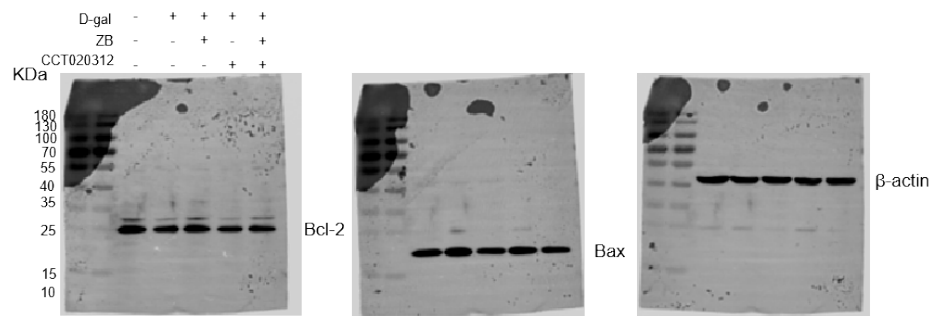

When GSK2606414 (0.25  $\mu$ M) and ZB (8  $\mu$ M) were applied to treat cells together, repetitive Western blotting images of GRP78, p-PERK/PERK, CHOP, Caspase-12 and Bcl-2/Bax in D-gal-induced SH-SY5Y cells.

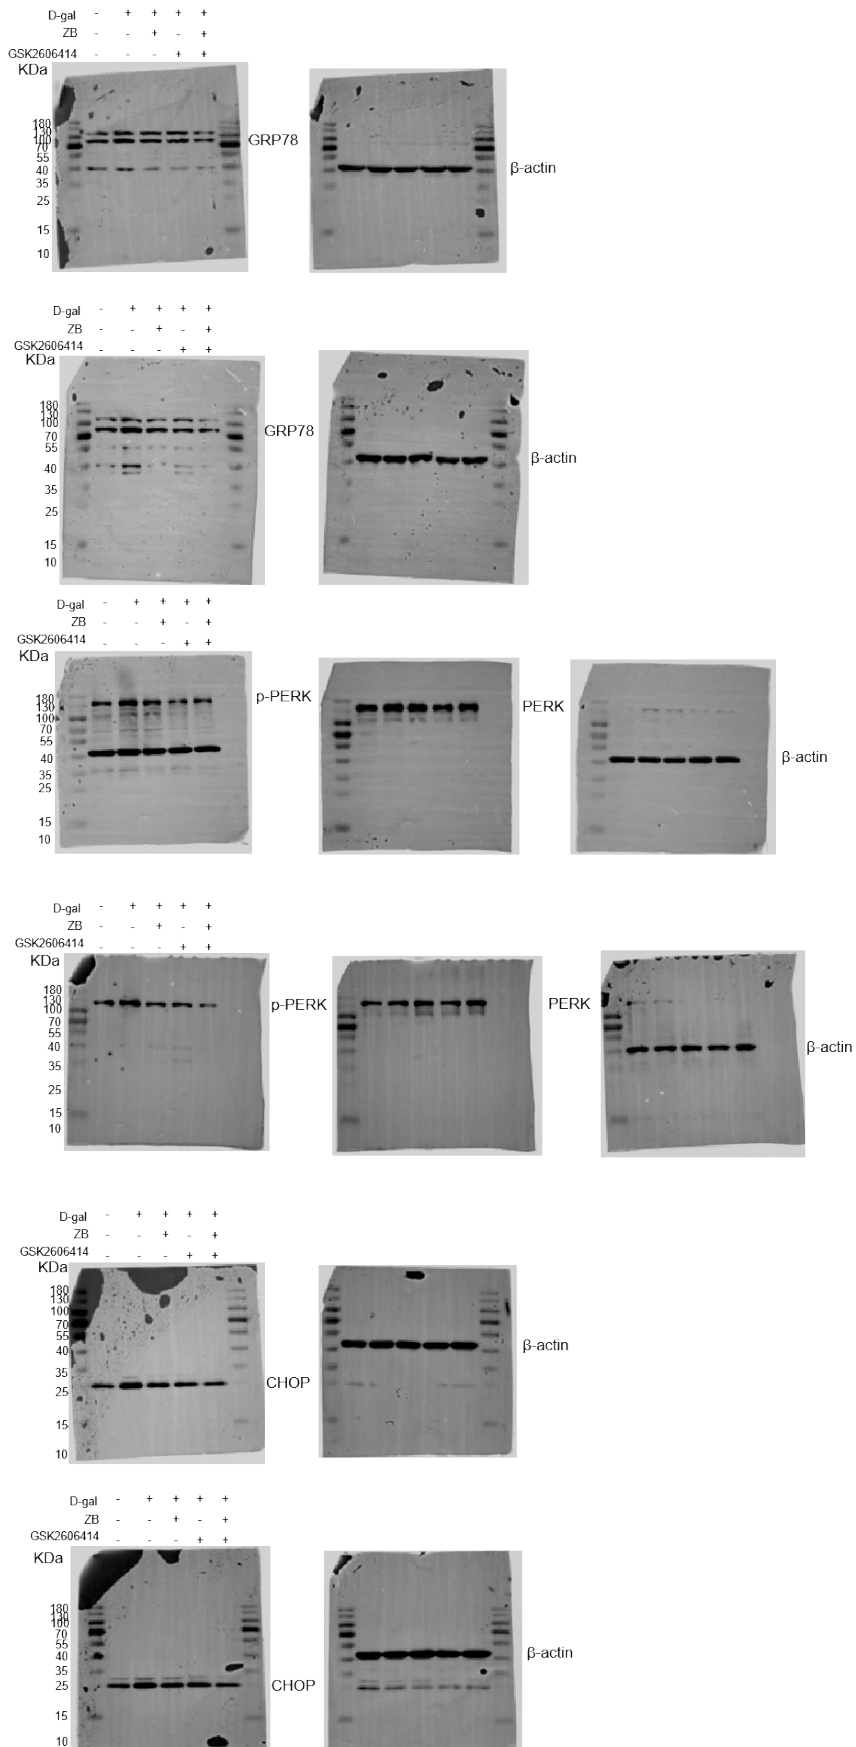

|            |   |   |   |   |   |
|------------|---|---|---|---|---|
| D-gal      | - | + | + | + | + |
| ZB         | - | - | + | - | + |
| GSK2606414 | - | - | - | + | + |

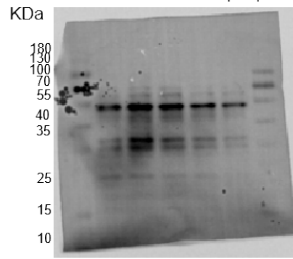

caspase-12

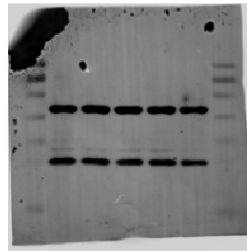

β-actin

|            |   |   |   |   |   |
|------------|---|---|---|---|---|
| D-gal      | - | + | + | + | + |
| ZB         | - | - | + | - | + |
| GSK2606414 | - | - | - | + | + |

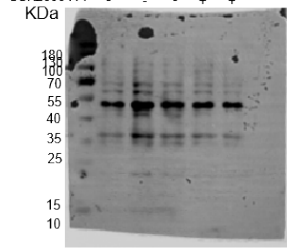

caspase-12

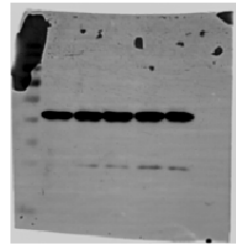

β-actin

|            |   |   |   |   |   |
|------------|---|---|---|---|---|
| D-gal      | - | + | + | + | + |
| ZB         | - | - | + | - | + |
| GSK2606414 | - | - | - | + | + |

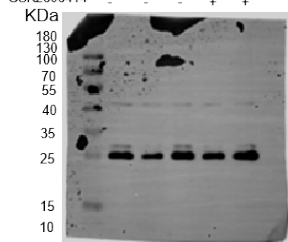

Bcl-2

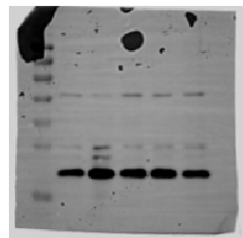

Bax

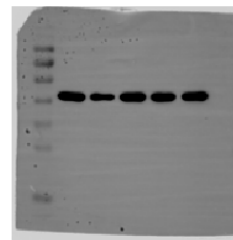

β-actin

|            |   |   |   |   |   |
|------------|---|---|---|---|---|
| D-gal      | - | + | + | + | + |
| ZB         | - | - | + | - | + |
| GSK2606414 | - | - | - | + | + |

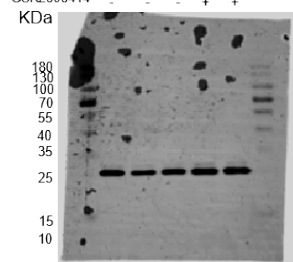

Bcl-2

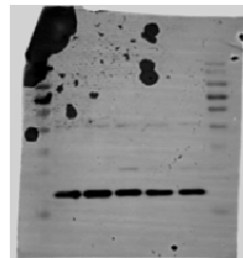

Bax

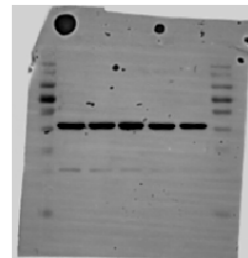

β-actin



**Fig.6. Calculation of medium efficiency equations and molecular docking**

Repetitive Western blotting images of p-PERK/PERK in D-gal-induced SH-SY5Y cells.

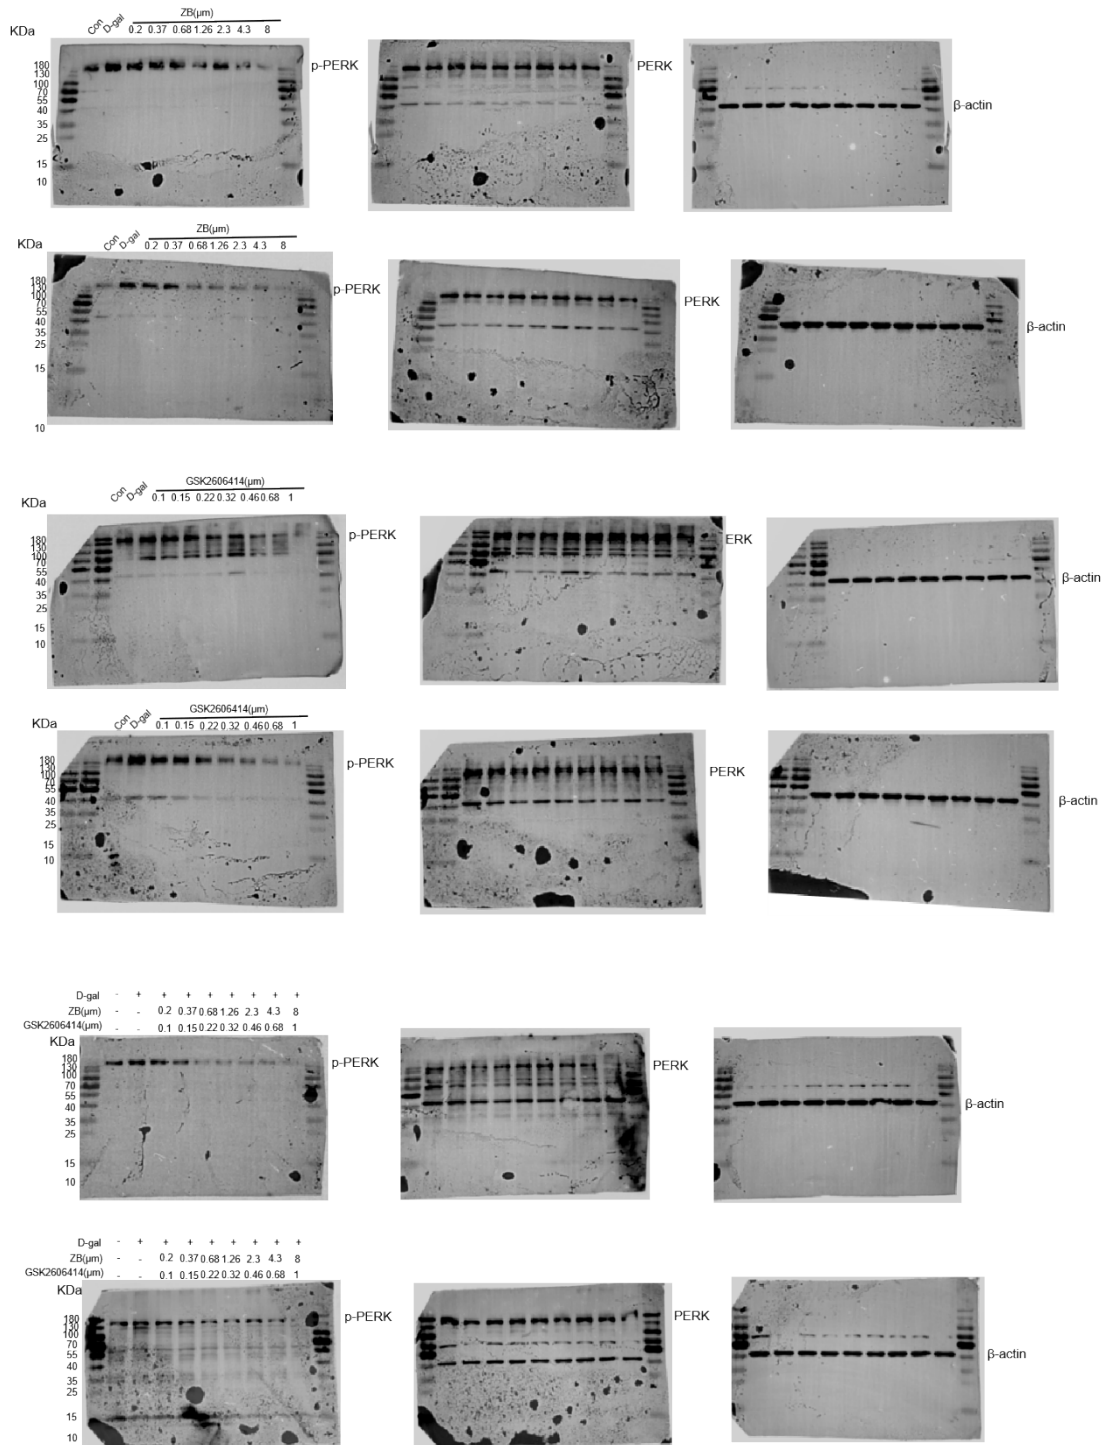

**Fig.7. Zerumbone reversed tunicamycin-induced the activation of PERK/CHOP pathway and apoptosis in vitro.**

Repetitive Western blotting images of GRP78, p-PERK/PERK, CHOP, Caspase-12 and Bcl-2/Bax in tunicamycin-induced SH-SY5Y cells.

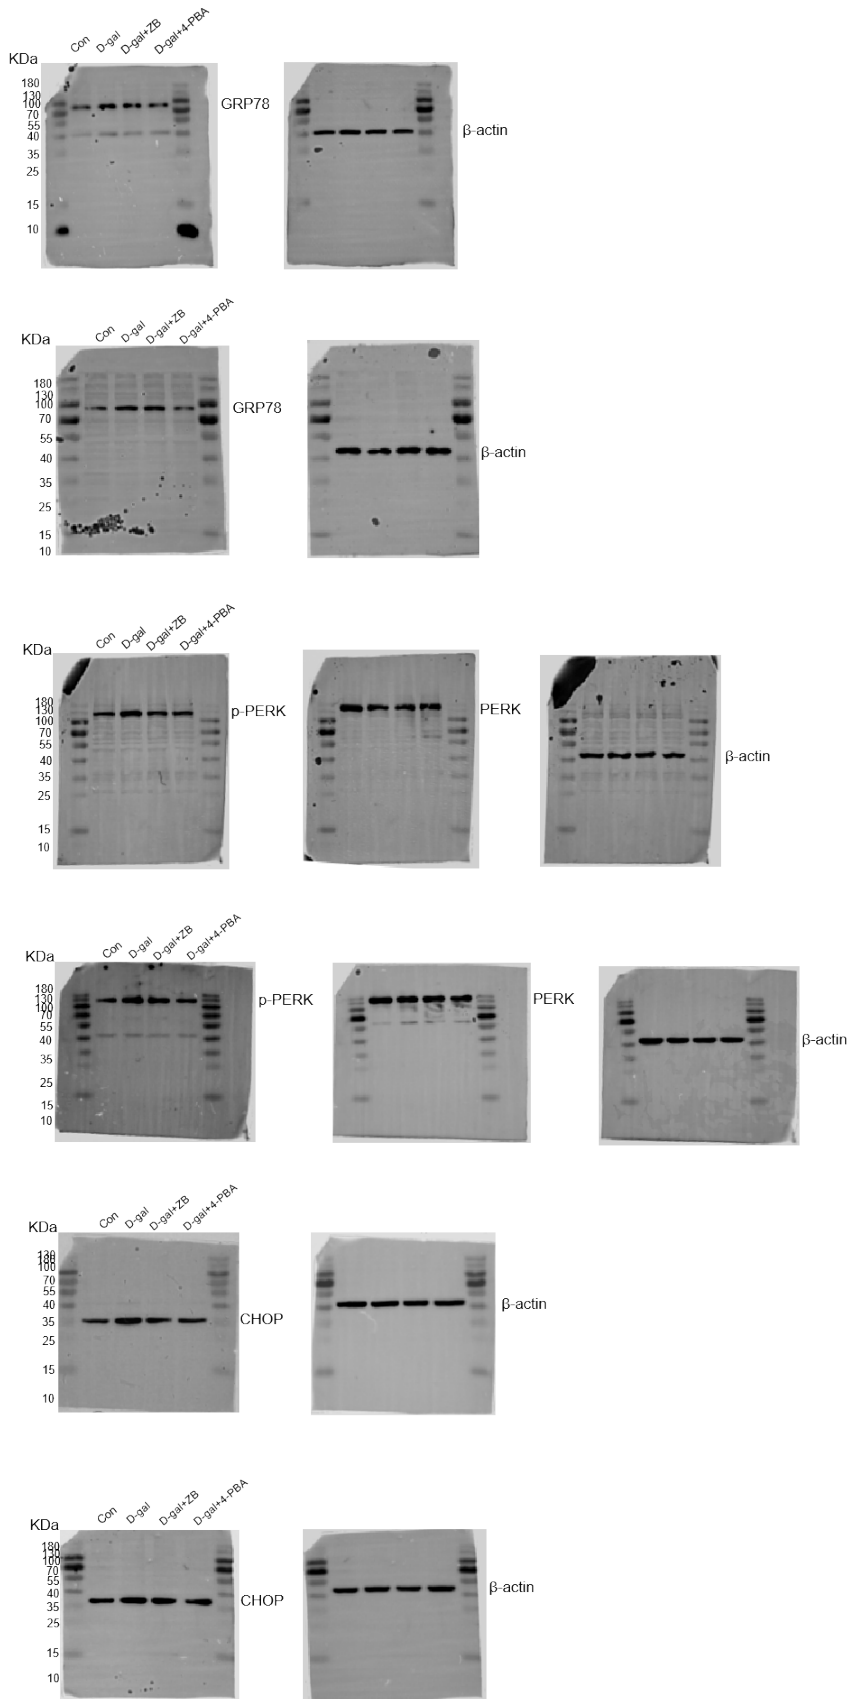

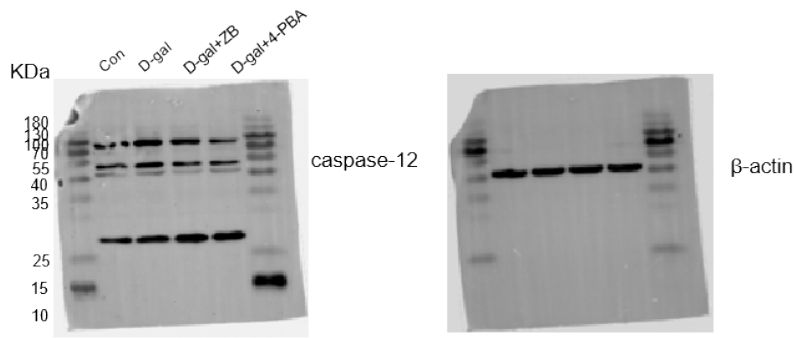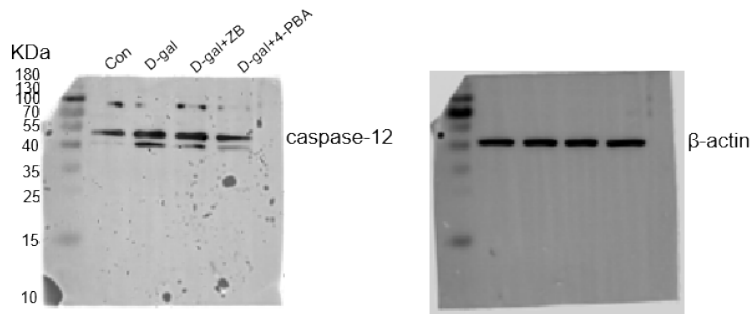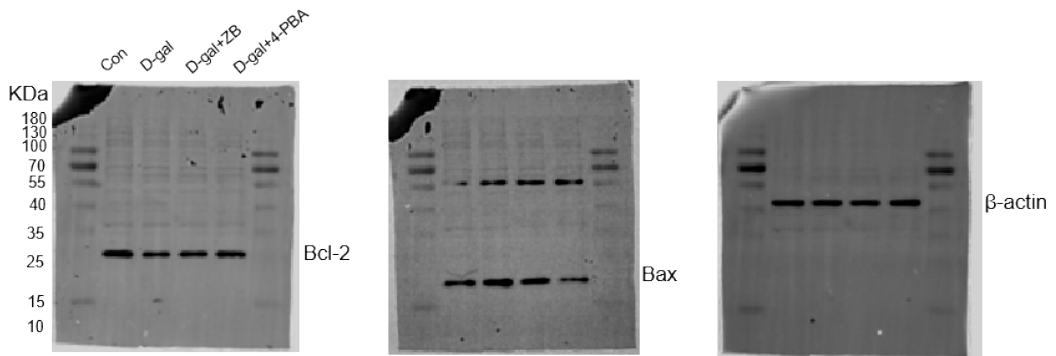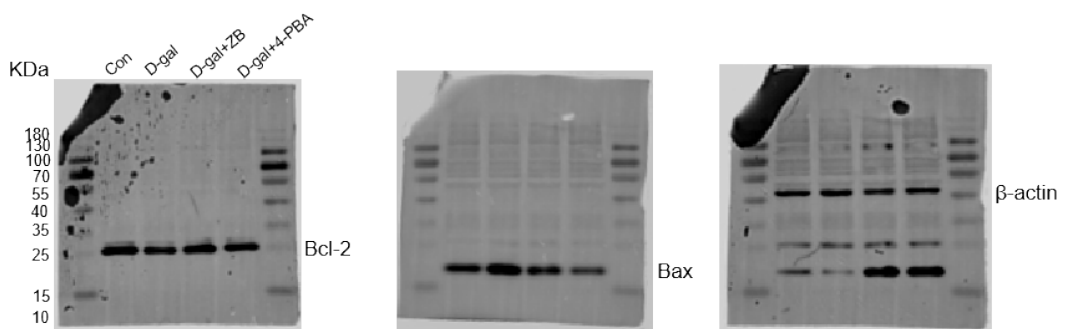

Supplement: d4fo00402g2.pdf [file d4fo00402g2.pdf]
